# Supplementary material for: Reversible substrate binding at copper centers in neutral copper(i) carbene complexes derived from bis(3-tert-butylimidazole-2-ylidene)methane
Source: Royal Society of Chemistry journal article supplement (doi:10.1039/b813790k), 2009-01-01
Supplement: b813790k.pdf [file b813790k.pdf]

## Supporting Information

### Reversible Substrate Binding at Copper Center in Neutral Copper(I) Carbene Complex Derived from Bis(3-*tert*-butylimidazole-2-ylidene)methane

Peter Hofmann,\* Igor V. Shishkov and Frank Rominger

Organisch-Chemisches Institut der Universität Heidelberg, Im Neuenheimer Feld 270, D-  
69120 Heidelberg, Germany.

#### Contents:

|                                                                                                                                            |     |
|--------------------------------------------------------------------------------------------------------------------------------------------|-----|
| Calculation results for compounds <b>3#a-b</b> , <b>6-7</b> and <b>3#·Et<sub>3</sub>N</b> .                                                | S1  |
| Graphical representation of B3LYP/SV(P)-optimized<br>structure of <b>3#·Et<sub>3</sub>N</b> in a gas phase                                 | S12 |
| Comparison of geometrical parameters of B3LYP/SV(P) and<br>BP86/SV(P)-equilibrium structures of <b>6-7</b> and <b>3#·Et<sub>3</sub>N</b> . | S12 |

## Calculation results for compounds 3#a-b, 6-7 and 3#·Et<sub>3</sub>N.

Calculation results for BP86/SV(P)-optimized structures in a gas phase are presented below. Computed atomic Cartesian coordinates (x, y, z) are given in 1 Å scale; the energy and zero-point corrected energies are given in atomic units; NIMAG is the number of imaginary vibrations.

### Results for 3#a

|    |            |            |            |
|----|------------|------------|------------|
| Cu | -0.3725337 | -0.0869029 | -3.0775495 |
| Cu | -0.3847228 | 0.0860869  | 3.0710489  |
| Br | -0.6954422 | -1.8806297 | -4.3950209 |
| Br | -0.6998855 | 1.8720869  | 4.4003818  |
| C  | -0.1058778 | 1.2380531  | -1.7636721 |
| N  | -0.5540317 | 1.1233548  | -0.4679770 |
| C  | -0.1231928 | 2.1842978  | 0.3232745  |
| H  | -0.3629311 | 2.2683927  | 1.3945143  |
| C  | 0.6104454  | 2.9934313  | -0.5052874 |
| H  | 1.1164565  | 3.9353568  | -0.2789671 |
| N  | 0.6122761  | 2.4041735  | -1.7709463 |
| C  | -1.3538638 | -0.0087334 | -0.0141787 |
| H  | -1.9633857 | -0.3471210 | -0.8759226 |
| H  | -2.0024160 | 0.3255307  | 0.8200861  |
| C  | -0.1175842 | -1.2410516 | 1.7590758  |
| N  | -0.5642002 | -1.1382995 | 0.4621503  |
| C  | -0.1409809 | -2.2113743 | -0.3166468 |
| H  | -0.3789079 | -2.3039911 | -1.3874561 |
| C  | 0.5888920  | -3.0148490 | 0.5203351  |
| H  | 1.0813370  | -3.9668246 | 0.3068630  |
| N  | 0.5925119  | -2.4121636 | 1.7797126  |
| C  | 2.3090386  | 1.9100923  | -3.5033612 |
| C  | 1.2801291  | 2.9473612  | -3.0079855 |
| H  | 3.0767570  | 1.7040281  | -2.7262049 |
| H  | 1.8029984  | 0.9521582  | -3.7613522 |
| H  | 2.8200650  | 2.2891570  | -4.4147463 |
| C  | 0.1963427  | 3.1843377  | -4.0803913 |
| C  | 1.9898181  | 4.2704209  | -2.6748076 |
| H  | -0.5648517 | 3.9133327  | -3.7266817 |
| H  | 0.6612971  | 3.5808954  | -5.0085115 |
| H  | -0.3177073 | 2.2290152  | -4.3288079 |
| H  | 2.4768024  | 4.6537605  | -3.5961428 |
| H  | 1.2781060  | 5.0505450  | -2.3274352 |
| H  | 2.7856305  | 4.1370569  | -1.9099174 |
| C  | 2.4071841  | -1.9187356 | 3.3826043  |
| C  | 1.2976384  | -2.9241548 | 3.0095455  |
| H  | 3.1336833  | -1.7933802 | 2.5500537  |
| H  | 1.9645646  | -0.9246391 | 3.6170474  |
| H  | 2.9575660  | -2.2740376 | 4.2807155  |
| C  | 0.2707027  | -3.0387301 | 4.1541077  |
| C  | 1.9108144  | -4.3037187 | 2.7163960  |
| H  | -0.5525806 | -3.7365691 | 3.8877187  |
| H  | 0.7693878  | -3.4139779 | 5.0735825  |
| H  | -0.1722600 | -2.0426680 | 4.3810498  |
| H  | 2.4060825  | -4.6757438 | 3.6379644  |
| H  | 1.1388732  | -5.0498922 | 2.4281455  |
| H  | 2.6855004  | -4.2571647 | 1.9201539  |

functional BP86

geometry optimisation SV(P)

Energy -9234.0381972320

NIMAG 0

Zero-point correction 0.3696542

single point TZVP

Energy -9236.0353750520

---

### Results for 3#a

|    |           |           |           |
|----|-----------|-----------|-----------|
| Cu | -0.365223 | -0.091467 | -3.102781 |
| Cu | -0.368158 | 0.091761  | 3.099726  |
| Br | -0.701464 | -1.920017 | -4.391857 |
| Br | -0.702646 | 1.918151  | 4.391891  |
| C  | -0.083123 | 1.256209  | -1.762652 |
| N  | -0.513490 | 1.126550  | -0.473097 |
| C  | -0.101829 | 2.196589  | 0.310359  |
| H  | -0.336309 | 2.284562  | 1.373141  |
| C  | 0.601949  | 3.014907  | -0.517076 |
| H  | 1.082242  | 3.961937  | -0.295362 |
| N  | 0.605651  | 2.427236  | -1.780386 |
| C  | -1.303121 | -0.002901 | -0.003242 |
| H  | -1.928805 | -0.344493 | -0.839730 |
| H  | -1.935224 | 0.337822  | 0.828785  |
| C  | -0.085949 | -1.257908 | 1.761527  |
| N  | -0.515633 | -1.131920 | 0.471416  |
| C  | -0.102768 | -2.203764 | -0.309039 |
| H  | -0.337022 | -2.294691 | -1.371637 |
| C  | 0.600632  | -3.019671 | 0.521087  |
| H  | 1.081779  | -3.966933 | 0.302267  |
| N  | 0.602574  | -2.429007 | 1.783002  |
| C  | 2.323862  | 1.996683  | -3.508322 |
| C  | 1.256376  | 2.989878  | -3.014340 |
| H  | 3.083523  | 1.810578  | -2.728491 |
| H  | 1.868033  | 1.030852  | -3.787479 |
| H  | 2.831511  | 2.405197  | -4.399631 |
| C  | 0.173809  | 3.202088  | -4.088720 |
| C  | 1.920398  | 4.334141  | -2.681014 |
| H  | -0.610795 | 3.890785  | -3.728336 |
| H  | 0.627011  | 3.634381  | -4.997687 |
| H  | -0.302100 | 2.245446  | -4.365271 |
| H  | 2.391365  | 4.731809  | -3.595493 |
| H  | 1.187942  | 5.083716  | -2.334061 |
| H  | 2.713595  | 4.227924  | -1.920305 |
| C  | 2.342255  | -1.996163 | 3.487586  |

|   |           |           |          |
|---|-----------|-----------|----------|
| C | 1.259284  | -2.984208 | 3.017138 |
| H | 3.097552  | -1.830212 | 2.698897 |
| H | 1.898401  | -1.021686 | 3.755659 |
| H | 2.852674  | -2.397020 | 4.380798 |
| C | 0.186538  | -3.171676 | 4.105773 |
| C | 1.904414  | -4.340073 | 2.693687 |
| H | -0.610601 | -3.854272 | 3.761826 |
| H | 0.645227  | -3.600040 | 5.013833 |
| H | -0.274118 | -2.206360 | 4.377982 |
| H | 2.375395  | -4.734536 | 3.609527 |
| H | 1.159928  | -5.082869 | 2.357947 |
| H | 2.694775  | -4.251664 | 1.927774 |

---

functional B3LYP

geometry optimisation SV(P)

Energy -9231.9772522280

NIMAG 0

Zero-point correction 0.3803564

single point TZVP

Energy -9233.9763055270

---

### Results for 3#b

|    |            |            |            |
|----|------------|------------|------------|
| Cu | -0.1439532 | -0.7778098 | -1.2065986 |
| Cu | -0.1820031 | -0.7805169 | 1.2246446  |
| Br | 1.7529294  | -1.7976377 | 0.0289725  |
| Br | -1.9464360 | -2.1049440 | -0.0062801 |
| C  | -0.4460229 | 0.9719744  | -1.9048872 |
| N  | -1.2079679 | 1.9181352  | -1.2451378 |
| C  | -1.1797822 | 3.1448657  | -1.9031571 |
| H  | -1.7362417 | 4.0222286  | -1.5542737 |
| C  | -0.3849686 | 2.9730835  | -3.0052644 |
| H  | -0.1231564 | 3.6872007  | -3.7906535 |
| N  | 0.0515674  | 1.6478028  | -2.9914260 |
| C  | 1.0380333  | 1.0389339  | -3.9529422 |
| C  | 1.1900781  | 1.9517288  | -5.1827013 |
| H  | 0.2180416  | 2.1210730  | -5.6966854 |
| H  | 1.8732734  | 1.4629410  | -5.9090262 |
| H  | 1.6391640  | 2.9359114  | -4.9252509 |
| C  | 0.5163993  | -0.3414866 | -4.3982749 |
| H  | -0.4890525 | -0.2640609 | -4.8661371 |
| H  | 0.4454840  | -1.0325362 | -3.5277893 |
| H  | 1.2197689  | -0.7869454 | -5.1346690 |
| C  | 2.3888693  | 0.8950844  | -3.2198509 |

|   |            |            |            |
|---|------------|------------|------------|
| H | 2.2757409  | 0.2448902  | -2.3238864 |
| H | 2.7686591  | 1.8876805  | -2.8911253 |
| H | 3.1441533  | 0.4368307  | -3.8949994 |
| C | -1.9442184 | 1.6434840  | -0.0135590 |
| H | -2.2023924 | 0.5606238  | -0.0061140 |
| H | -2.8664716 | 2.2588345  | -0.0164284 |
| C | -0.4645684 | 0.9833702  | 1.8960939  |
| N | -1.2042938 | 1.9309363  | 1.2127514  |
| C | -1.1510930 | 3.1713058  | 1.8430670  |
| H | -1.6859007 | 4.0536420  | 1.4734231  |
| C | -0.3631671 | 3.0071559  | 2.9512491  |
| H | -0.0871189 | 3.7322184  | 3.7216757  |
| N | 0.0429941  | 1.6722674  | 2.9699140  |
| C | 1.0214696  | 1.0689751  | 3.9424510  |
| C | 0.5092197  | -0.3173738 | 4.3798700  |
| H | 0.4635965  | -1.0124327 | 3.5106044  |
| H | -0.5048932 | -0.2530730 | 4.8305105  |
| H | 1.2064580  | -0.7517786 | 5.1285809  |
| C | 2.3826134  | 0.9377080  | 3.2260766  |
| H | 2.2864783  | 0.2855868  | 2.3295553  |
| H | 3.1340540  | 0.4873150  | 3.9107708  |
| H | 2.7573590  | 1.9334501  | 2.9011607  |
| C | 1.1480356  | 1.9808468  | 5.1763761  |
| H | 1.6020293  | 2.9654980  | 4.9294094  |
| H | 1.8170755  | 1.4929521  | 5.9163294  |
| H | 0.1650699  | 2.1499037  | 5.6689880  |

---

functional BP86

geometry optimisation SV(P)

Energy -9234.0351406450

NIMAG 0

Zero-point correction 0.3686085

single point TZVP

Energy -9236.0239496270

---

### Results for 3#b

|    |           |           |           |
|----|-----------|-----------|-----------|
| Cu | -0.187504 | -0.828333 | -1.250977 |
| Cu | -0.107831 | -0.821733 | 1.218263  |
| Br | 1.816658  | -1.779899 | -0.051380 |
| Br | -1.964381 | -2.134451 | 0.007025  |
| C  | -0.472978 | 0.997642  | -1.893450 |
| N  | -1.220463 | 1.910338  | -1.194902 |
| C  | -1.182773 | 3.160358  | -1.797863 |

|   |           |           |           |
|---|-----------|-----------|-----------|
| H | -1.724000 | 4.021881  | -1.411508 |
| C | -0.396170 | 3.032281  | -2.898378 |
| H | -0.129979 | 3.772753  | -3.645358 |
| N | 0.029373  | 1.707191  | -2.942843 |
| C | 0.998430  | 1.138400  | -3.939901 |
| C | 1.142362  | 2.104819  | -5.126570 |
| H | 0.173015  | 2.300459  | -5.619487 |
| H | 1.812191  | 1.651090  | -5.876214 |
| H | 1.593439  | 3.068261  | -4.831353 |
| C | 0.466680  | -0.210840 | -4.452867 |
| H | -0.540252 | -0.103597 | -4.893445 |
| H | 0.412057  | -0.954275 | -3.639473 |
| H | 1.147519  | -0.606887 | -5.226514 |
| C | 2.359415  | 0.956752  | -3.241162 |
| H | 2.275239  | 0.264402  | -2.385593 |
| H | 2.739521  | 1.925346  | -2.868832 |
| H | 3.097139  | 0.545143  | -3.952601 |
| C | -1.959903 | 1.604414  | 0.024115  |
| H | -2.221096 | 0.534253  | 0.009992  |
| H | -2.876280 | 2.213524  | 0.026840  |
| C | -0.450052 | 0.972374  | 1.915473  |
| N | -1.232638 | 1.884205  | 1.256688  |
| C | -1.238634 | 3.109305  | 1.910449  |
| H | -1.813106 | 3.964857  | 1.560687  |
| C | -0.443849 | 2.965123  | 3.002914  |
| H | -0.200738 | 3.684087  | 3.778232  |
| N | 0.029386  | 1.655113  | 2.992093  |
| C | 1.026602  | 1.081253  | 3.959327  |
| C | 0.537175  | -0.298057 | 4.433969  |
| H | 0.487099  | -1.013320 | 3.595394  |
| H | -0.464546 | -0.230002 | 4.893954  |
| H | 1.241343  | -0.703301 | 5.181475  |
| C | 2.382306  | 0.958311  | 3.237875  |
| H | 2.302546  | 0.290489  | 2.362784  |
| H | 3.141247  | 0.543890  | 3.924881  |
| H | 2.732708  | 1.947182  | 2.890533  |
| C | 1.158612  | 2.013343  | 5.174296  |
| H | 1.581379  | 2.997052  | 4.904365  |
| H | 1.846876  | 1.553249  | 5.902960  |
| H | 0.189124  | 2.168193  | 5.680992  |

---

functional B3LYP

geometry optimisation SV(P)

Energy -9231.9687790290

NIMAG 0

Zero-point correction 0.3788347

single point TZVP

Energy -9233.9598379370

---

### Results for 6

|    |            |            |            |
|----|------------|------------|------------|
| Cu | 0.1566914  | -0.2087183 | -1.3744347 |
| Cu | 0.1906301  | 0.4079049  | 1.2623328  |
| Br | 2.2622413  | -0.1566897 | -0.0172095 |
| Br | -0.8373383 | -1.4900608 | 2.3213457  |
| C  | -0.7465658 | 1.2978614  | -2.1401508 |
| N  | -1.8299754 | 1.9594382  | -1.5973838 |
| C  | -2.2570534 | 3.0062416  | -2.4094690 |
| H  | -3.1088435 | 3.6483751  | -2.1583048 |
| C  | -1.4308313 | 3.0072202  | -3.5006157 |
| H  | -1.4401699 | 3.6585103  | -4.3782895 |
| N  | -0.5188902 | 1.9657828  | -3.3245887 |
| C  | 0.6199412  | 1.6369864  | -4.2536308 |
| C  | 0.5190095  | 2.4985735  | -5.5257363 |
| H  | -0.4332880 | 2.3269525  | -6.0743370 |
| H  | 1.3513281  | 2.2206288  | -6.2058142 |
| H  | 0.6215710  | 3.5839448  | -5.3072912 |
| C  | 0.5312482  | 0.1471319  | -4.6389952 |
| H  | -0.4282290 | -0.0742940 | -5.1566624 |
| H  | 0.5986777  | -0.4977611 | -3.7346422 |
| H  | 1.3694435  | -0.1176165 | -5.3190372 |
| C  | 1.9434600  | 1.9391647  | -3.5201278 |
| H  | 2.0268353  | 1.3375309  | -2.5877526 |
| H  | 2.0042029  | 3.0155185  | -3.2456620 |
| H  | 2.8071563  | 1.6959643  | -4.1768527 |
| C  | -2.3600363 | 1.6742791  | -0.2693194 |
| H  | -2.1178842 | 0.6187696  | -0.0221938 |
| H  | -3.4592138 | 1.8260706  | -0.2789876 |
| C  | -0.6188797 | 2.1478474  | 1.4304920  |
| N  | -1.7736895 | 2.5084295  | 0.7660092  |
| C  | -2.2328004 | 3.7631412  | 1.1615921  |
| H  | -3.1450214 | 4.2231016  | 0.7642879  |
| C  | -1.3489012 | 4.2077712  | 2.1085181  |
| H  | -1.3591964 | 5.1373170  | 2.6841311  |
| N  | -0.3755061 | 3.2187887  | 2.2590188  |
| C  | 0.8144356  | 3.2821367  | 3.1779312  |
| C  | 0.7636304  | 2.0712362  | 4.1307475  |
| H  | 0.7459930  | 1.1142237  | 3.5620288  |
| H  | -0.1483952 | 2.1007982  | 4.7663685  |
| H  | 1.6575345  | 2.0720103  | 4.7919348  |
| C  | 2.0906660  | 3.2504691  | 2.3119589  |
| H  | 2.1253877  | 2.3263666  | 1.6932562  |
| H  | 2.9919822  | 3.2739520  | 2.9626778  |
| H  | 2.1269145  | 4.1294345  | 1.6303533  |
| C  | 0.7715977  | 4.5840708  | 3.9969381  |

|   |            |            |            |
|---|------------|------------|------------|
| H | 0.8310946  | 5.4886851  | 3.3524155  |
| H | 1.6509684  | 4.6043464  | 4.6753827  |
| H | -0.1391774 | 4.6500146  | 4.6320652  |
| C | 0.2733107  | -2.9935026 | -0.4992404 |
| H | 1.0186923  | -2.6899936 | 0.2425908  |
| N | -0.1761579 | -2.1915208 | -1.4677052 |
| C | -1.1276933 | -2.9161833 | -2.1601139 |
| H | -1.6654231 | -2.4919749 | -3.0173555 |
| C | -1.2421876 | -4.1723768 | -1.5976797 |
| H | -1.8781353 | -5.0251751 | -1.8577427 |
| N | -0.3390959 | -4.2092023 | -0.5397132 |
| C | -0.2065404 | -5.3155224 | 0.4590090  |
| C | 0.9543298  | -4.9964304 | 1.4185459  |
| H | 1.9187641  | -4.8919619 | 0.8749452  |
| H | 1.0604543  | -5.8315253 | 2.1437629  |
| H | 0.7550051  | -4.0642441 | 1.9923045  |
| C | 0.0754574  | -6.6306119 | -0.2964581 |
| H | 1.0079234  | -6.5512853 | -0.8969799 |
| H | -0.7568447 | -6.9052953 | -0.9805817 |
| H | 0.1994720  | -7.4619943 | 0.4309580  |
| C | -1.5269337 | -5.3961219 | 1.2563779  |
| H | -2.3868426 | -5.6387793 | 0.5944325  |
| H | -1.7254534 | -4.4228506 | 1.7569717  |
| H | -1.4543022 | -6.1898058 | 2.0322990  |

---

functional BP86

geometry optimisation SV(P)

Energy -9617.2490806660

NIMAG 0

Zero-point correction 0.5480878

single point TZVP

Energy -9619.6618107170

---

### Results for 6

|    |            |            |            |
|----|------------|------------|------------|
| Cu | 0.1779437  | -0.3276792 | -1.3973137 |
| Cu | 0.2336856  | 0.4709898  | 1.3111546  |
| Br | 2.2895309  | -0.1393160 | -0.0047713 |
| Br | -1.0190369 | -1.3390897 | 2.3312500  |
| C  | -0.7342233 | 1.1927410  | -2.2280984 |
| N  | -1.7614951 | 1.9100528  | -1.6763936 |
| C  | -2.1910753 | 2.9213199  | -2.5244732 |
| H  | -3.0038367 | 3.5997211  | -2.2734122 |
| C  | -1.4189737 | 2.8398021  | -3.6386582 |

|   |            |            |            |
|---|------------|------------|------------|
| H | -1.4469575 | 3.4418840  | -4.5405732 |
| N | -0.5351038 | 1.7814600  | -3.4462002 |
| C | 0.5390441  | 1.3632905  | -4.4106640 |
| C | 0.4111033  | 2.1705211  | -5.7127437 |
| H | -0.5665993 | 2.0177455  | -6.2039358 |
| H | 1.1912923  | 1.8312170  | -6.4145174 |
| H | 0.5657656  | 3.2513217  | -5.5494564 |
| C | 0.3722403  | -0.1327578 | -4.7303773 |
| H | -0.6264612 | -0.3353869 | -5.1576834 |
| H | 0.4929146  | -0.7513011 | -3.8256025 |
| H | 1.1358469  | -0.4444660 | -5.4643327 |
| C | 1.9100772  | 1.6414309  | -3.7670374 |
| H | 2.0298295  | 1.0880339  | -2.8200161 |
| H | 2.0275302  | 2.7188928  | -3.5512596 |
| H | 2.7180821  | 1.3366020  | -4.4556990 |
| C | -2.2699160 | 1.7089213  | -0.3272748 |
| H | -2.0508253 | 0.6764527  | -0.0175510 |
| H | -3.3599114 | 1.8683282  | -0.3341795 |
| C | -0.5564271 | 2.2813912  | 1.3692350  |
| N | -1.6740828 | 2.6036477  | 0.6467887  |
| C | -2.1261980 | 3.8838124  | 0.9429409  |
| H | -3.0098667 | 4.3249484  | 0.4855203  |
| C | -1.2728251 | 4.3782259  | 1.8778162  |
| H | -1.2836710 | 5.3408173  | 2.3786971  |
| N | -0.3214272 | 3.3911878  | 2.1255920  |
| C | 0.8145294  | 3.4922413  | 3.1027561  |
| C | 0.6480280  | 2.3881188  | 4.1631809  |
| H | 0.6362221  | 1.3861061  | 3.7014286  |
| H | -0.3004334 | 2.5149666  | 4.7149924  |
| H | 1.4822323  | 2.4322100  | 4.8856921  |
| C | 2.1374691  | 3.3271614  | 2.3335591  |
| H | 2.1773319  | 2.3570994  | 1.8101146  |
| H | 2.9886985  | 3.3817047  | 3.0353960  |
| H | 2.2558702  | 4.1283278  | 1.5814469  |
| C | 0.7898657  | 4.8658254  | 3.7909083  |
| H | 0.9154167  | 5.6945149  | 3.0713854  |
| H | 1.6310269  | 4.9181003  | 4.5028113  |
| H | -0.1388638 | 5.0271306  | 4.3664553  |
| C | 0.3049784  | -3.0655233 | -0.3718547 |
| H | 1.0531757  | -2.7167363 | 0.3337158  |
| N | -0.1531018 | -2.3349874 | -1.3777573 |
| C | -1.1067217 | -3.1026179 | -2.0064650 |
| H | -1.6530253 | -2.7422295 | -2.8778695 |
| C | -1.2105322 | -4.3114164 | -1.3654619 |
| H | -1.8459437 | -5.1725144 | -1.5579316 |
| N | -0.2993193 | -4.2764987 | -0.3209990 |
| C | -0.1417124 | -5.3181684 | 0.7350895  |
| C | 1.0143014  | -4.9282312 | 1.6693518  |
| H | 1.9677019  | -4.8340595 | 1.1198739  |
| H | 1.1394480  | -5.7183280 | 2.4298478  |

|   |            |            |            |
|---|------------|------------|------------|
| H | 0.8046103  | -3.9798602 | 2.1937610  |
| C | 0.1638483  | -6.6651512 | 0.0544742  |
| H | 1.0892691  | -6.6027937 | -0.5452800 |
| H | -0.6573512 | -6.9858421 | -0.6104679 |
| H | 0.2996321  | -7.4497021 | 0.8195956  |
| C | -1.4529063 | -5.3873527 | 1.5426485  |
| H | -2.3037187 | -5.6850445 | 0.9040410  |
| H | -1.6753394 | -4.4020121 | 1.9885620  |
| H | -1.3569440 | -6.1324679 | 2.3527097  |

---

functional B3LYP

geometry optimisation SV(P)

Energy -9614.9137679930

NIMAG 0

Zero-point correction 0.5634515

single point TZVP

Energy -9617.3341102280

---

### Results for 7

|    |            |            |            |
|----|------------|------------|------------|
| Cu | 0.0759457  | 1.3236470  | -0.0462566 |
| Cu | 0.2161141  | -1.2521274 | -0.7963411 |
| Br | 2.2176980  | 0.2002737  | -0.8072268 |
| Br | -1.2732980 | -0.9399260 | -2.6968549 |
| C  | -0.6252485 | 1.1136762  | 1.7312618  |
| N  | -1.6194533 | 0.2210624  | 2.0964409  |
| C  | -1.9132925 | 0.2964416  | 3.4538512  |
| H  | -2.6694469 | -0.3333275 | 3.9363033  |
| C  | -1.0915096 | 1.2568290  | 3.9721798  |
| H  | -1.0151395 | 1.6332063  | 4.9965308  |
| N  | -0.3056230 | 1.7357444  | 2.9215016  |
| C  | 0.6819103  | 2.8516434  | 3.1122423  |
| C  | 1.6434906  | 2.9229532  | 1.9187854  |
| H  | 2.2110673  | 1.9792573  | 1.7807887  |
| H  | 2.3626712  | 3.7548566  | 2.0825080  |
| H  | 1.0948354  | 3.1246374  | 0.9715789  |
| C  | -0.1087565 | 4.1719842  | 3.2428897  |
| H  | -0.6902887 | 4.3690238  | 2.3158248  |
| H  | 0.5857338  | 5.0235801  | 3.4085258  |
| H  | -0.8201451 | 4.1385246  | 4.0979557  |
| C  | 1.5018962  | 2.5767781  | 4.3928459  |
| H  | 0.8867577  | 2.6230537  | 5.3173657  |
| H  | 2.2982898  | 3.3452423  | 4.4921625  |
| H  | 1.9906619  | 1.5797830  | 4.3414459  |

|   |            |            |            |
|---|------------|------------|------------|
| C | -2.1924428 | -0.7759410 | 1.1997819  |
| H | -2.0465720 | -0.4331942 | 0.1514445  |
| H | -3.2750002 | -0.8778791 | 1.4214634  |
| C | -0.4520315 | -2.4290745 | 0.5756992  |
| N | -1.5655792 | -2.0825237 | 1.3192084  |
| C | -1.9711891 | -3.1122364 | 2.1647670  |
| H | -2.8437173 | -3.0402014 | 2.8245134  |
| C | -1.0979457 | -4.1427785 | 1.9505347  |
| H | -1.0731437 | -5.1413250 | 2.3994268  |
| N | -0.1813921 | -3.7124794 | 0.9856763  |
| C | 0.9113280  | -4.5969427 | 0.4613598  |
| C | 0.2573633  | -5.8354698 | -0.1920561 |
| H | -0.3366217 | -6.4293451 | 0.5371008  |
| H | 1.0429372  | -6.5023489 | -0.6087621 |
| H | -0.4147548 | -5.5285679 | -1.0224167 |
| C | 1.8133174  | -5.0097035 | 1.6454802  |
| H | 2.2632041  | -4.1128306 | 2.1239138  |
| H | 2.6379475  | -5.6609368 | 1.2824709  |
| H | 1.2543088  | -5.5777310 | 2.4213335  |
| C | 1.7508381  | -3.8497159 | -0.5859693 |
| H | 2.2346943  | -2.9454220 | -0.1618464 |
| H | 1.1310794  | -3.5287799 | -1.4522692 |
| H | 2.5441650  | -4.5332347 | -0.9610726 |
| N | -0.4551432 | 2.1749619  | -1.8683241 |
| H | -0.6136331 | 1.2476403  | -2.3356648 |
| C | 0.5853680  | 2.9138007  | -2.6218167 |
| H | 0.2679494  | 3.0207022  | -3.6904152 |
| H | 1.5123423  | 2.3030776  | -2.5985520 |
| C | 0.8164313  | 4.3042500  | -2.0192311 |
| H | 1.5714605  | 4.8507871  | -2.6275531 |
| H | 1.2527675  | 4.1851358  | -1.0005129 |
| C | -0.4959255 | 5.1047062  | -1.9309101 |
| H | -0.3318140 | 6.0731566  | -1.4057643 |
| H | -0.8388636 | 5.3592515  | -2.9618009 |
| C | -1.5934579 | 4.2843150  | -1.2288521 |
| H | -1.3298090 | 4.1378438  | -0.1543860 |
| H | -2.5682087 | 4.8213559  | -1.2580052 |
| C | -1.7439383 | 2.9058950  | -1.8797099 |
| H | -2.4971627 | 2.2851707  | -1.3502234 |
| H | -2.1004850 | 3.0292886  | -2.9344820 |

---

functional BP86

geometry optimisation SV(P)

Energy -9485.7620511120

NIMAG 0

Zero-point correction 0.5244703

single point TZVP

Energy -9488.0379601010

---

### Results for 7

|    |            |            |            |
|----|------------|------------|------------|
| Cu | 0.0768741  | 1.3738818  | -0.0379437 |
| Cu | 0.2566556  | -1.2662387 | -0.8820240 |
| Br | 2.2570715  | 0.2125083  | -0.7222341 |
| Br | -1.3175388 | -0.8854856 | -2.7300135 |
| C  | -0.6681199 | 1.0963875  | 1.7594911  |
| N  | -1.6280975 | 0.1651588  | 2.0706352  |
| C  | -1.9410764 | 0.1827993  | 3.4222554  |
| H  | -2.6846081 | -0.4762431 | 3.8658560  |
| C  | -1.1638687 | 1.1424993  | 3.9815217  |
| H  | -1.1135537 | 1.4829018  | 5.0120489  |
| N  | -0.3876967 | 1.6872988  | 2.9606825  |
| C  | 0.6004098  | 2.7806449  | 3.2362784  |
| C  | 1.4069479  | 3.1246545  | 1.9803455  |
| H  | 1.9621523  | 2.2548130  | 1.5925573  |
| H  | 2.1325916  | 3.9165935  | 2.2352368  |
| H  | 0.7572506  | 3.5073245  | 1.1766260  |
| C  | -0.1758144 | 4.0263275  | 3.7078579  |
| H  | -0.8784129 | 4.3631261  | 2.9251594  |
| H  | 0.5275512  | 4.8504265  | 3.9192928  |
| H  | -0.7533191 | 3.8323816  | 4.6292879  |
| C  | 1.5728920  | 2.2924988  | 4.3296137  |
| H  | 1.0617441  | 2.0745775  | 5.2835984  |
| H  | 2.3281535  | 3.0720371  | 4.5287125  |
| H  | 2.0990965  | 1.3795066  | 4.0003085  |
| C  | -2.1770871 | -0.8093720 | 1.1379188  |
| H  | -2.0311006 | -0.4452705 | 0.1092773  |
| H  | -3.2545322 | -0.9194773 | 1.3387365  |
| C  | -0.4501135 | -2.4768924 | 0.5137552  |
| N  | -1.5537094 | -2.1165135 | 1.2438282  |
| C  | -1.9707330 | -3.1395035 | 2.0864763  |
| H  | -2.8379656 | -3.0576082 | 2.7392286  |
| C  | -1.1118050 | -4.1703299 | 1.8808714  |
| H  | -1.0965460 | -5.1609974 | 2.3280813  |
| N  | -0.1912760 | -3.7510469 | 0.9203812  |
| C  | 0.9070897  | -4.6397436 | 0.4238112  |
| C  | 0.2695534  | -5.8973288 | -0.1998622 |
| H  | -0.3424282 | -6.4597025 | 0.5272552  |
| H  | 1.0605033  | -6.5757628 | -0.5645320 |
| H  | -0.3728328 | -5.6229949 | -1.0547145 |
| C  | 1.8018902  | -5.0159086 | 1.6214274  |
| H  | 2.2126437  | -4.1087399 | 2.0982843  |
| H  | 2.6467796  | -5.6380850 | 1.2780438  |
| H  | 1.2518816  | -5.5927982 | 2.3863486  |
| C  | 1.7495348  | -3.9201397 | -0.6364164 |

|   |            |            |            |
|---|------------|------------|------------|
| H | 2.2444072  | -3.0233158 | -0.2308939 |
| H | 1.1357608  | -3.6129866 | -1.5004477 |
| H | 2.5279673  | -4.6149743 | -0.9989476 |
| N | -0.4414646 | 2.2583902  | -1.8719609 |
| H | -0.6237256 | 1.3491314  | -2.3320797 |
| C | 0.6240451  | 2.9543131  | -2.6227712 |
| H | 0.3194155  | 3.0651459  | -3.6860052 |
| H | 1.5248061  | 2.3214986  | -2.5926789 |
| C | 0.9001194  | 4.3365284  | -2.0269351 |
| H | 1.6669184  | 4.8521088  | -2.6333627 |
| H | 1.3294897  | 4.2090299  | -1.0151010 |
| C | -0.3827637 | 5.1793008  | -1.9476600 |
| H | -0.1900924 | 6.1373763  | -1.4296133 |
| H | -0.7093577 | 5.4377945  | -2.9743741 |
| C | -1.5105216 | 4.4033249  | -1.2486122 |
| H | -1.2660086 | 4.2670770  | -0.1768975 |
| H | -2.4594358 | 4.9688465  | -1.2943108 |
| C | -1.7016339 | 3.0268567  | -1.8877666 |
| H | -2.4707434 | 2.4412865  | -1.3578369 |
| H | -2.0527736 | 3.1555929  | -2.9349241 |

---

functional B3LYP

geometry optimisation SV(P)

Energy -9483.5127469420

NIMAG 0

Zero-point correction 0.5394402

single point TZVP

Energy -9485.7951373930

---

### Results for piperidine (chair conformation)

|   |            |            |            |
|---|------------|------------|------------|
| C | -1.4807093 | -0.2257821 | 0.0004164  |
| C | -0.7303895 | 0.2250802  | 1.2668458  |
| C | 0.7373229  | -0.2262404 | 1.2167510  |
| N | 1.3708566  | 0.2800753  | -0.0005783 |
| C | 0.7362284  | -0.2267126 | -1.2173205 |
| C | -0.7312502 | 0.2255042  | -1.2662062 |
| H | 1.2921301  | 0.1693583  | 2.0966510  |
| H | -0.7571589 | 1.3365845  | 1.3412467  |
| H | -1.2199249 | -0.1815445 | 2.1806477  |
| H | -1.5600074 | -1.3395906 | 0.0004212  |
| H | -2.5231176 | 0.1654962  | 0.0009807  |
| H | 2.3747683  | 0.0561598  | -0.0009410 |



|   |            |            |            |
|---|------------|------------|------------|
| H | 1.2910260  | 0.1681368  | -2.0975955 |
| H | 0.7664416  | -1.3530766 | -1.2875494 |
| H | -0.7572190 | 1.3371293  | -1.3390533 |
| H | -1.2218816 | -0.1793033 | -2.1802391 |
| H | 0.7680444  | -1.3525781 | 1.2876700  |

---

functional BP86

geometry optimisation SV(P)

Energy -251.7050364923

NIMAG 0

Zero-point correction 0.1543393

single point TZVP

Energy -251.9954710735

---

### Results for piperidine (chair conformation)

|   |           |           |           |
|---|-----------|-----------|-----------|
| C | -1.477743 | -0.223748 | -0.011238 |
| C | -0.738957 | 0.222784  | 1.260015  |
| C | 0.726807  | -0.224049 | 1.221824  |
| N | 1.366191  | 0.276235  | 0.010278  |
| C | 0.745411  | -0.224425 | -1.210733 |
| C | -0.719371 | 0.223019  | -1.270849 |
| H | 1.270722  | 0.172596  | 2.098042  |
| H | -0.769452 | 1.326104  | 1.336997  |
| H | -1.233421 | -0.185054 | 2.161149  |
| H | -1.563325 | -1.329124 | -0.012540 |
| H | -2.510176 | 0.171481  | -0.019249 |
| H | 2.364636  | 0.069562  | 0.018229  |
| H | 1.302400  | 0.172443  | -2.078493 |
| H | 0.782635  | -1.340999 | -1.282128 |
| H | -0.746386 | 1.326455  | -1.348183 |
| H | -1.200193 | -0.183348 | -2.179998 |
| H | 0.761574  | -1.340616 | 1.294195  |

---

functional B3LYP

geometry optimisation SV(P)

Energy -251.5222914308

NIMAG 0

Zero-point correction 0.1586106

---

single point TZVP

Energy -251.8172519694

---

### Results for *N*-tert-butylimidazole

|   |            |            |            |
|---|------------|------------|------------|
| C | -0.0074902 | -1.0745577 | -1.1049789 |
| H | -0.0115134 | -2.1139024 | -0.7543542 |
| N | 0.0035772  | -0.7060638 | -2.3771436 |
| C | 0.0018401  | 0.6695467  | -2.3513207 |
| H | 0.0060703  | 1.2639322  | -3.2764436 |
| C | -0.0113912 | 1.1334400  | -1.0447137 |
| H | -0.0065903 | 2.1477627  | -0.6296976 |
| N | -0.0181869 | 0.0011133  | -0.2393907 |
| C | 0.0026309  | -0.0022035 | 1.2486763  |
| C | -0.1343112 | -1.4458205 | 1.7678538  |
| H | -1.0757451 | -1.9190683 | 1.4141979  |
| H | -0.1565490 | -1.4328900 | 2.8785234  |
| H | 0.7227479  | -2.0819705 | 1.4576359  |
| C | -1.1843320 | 0.8382728  | 1.7686096  |
| H | -2.1490336 | 0.4240189  | 1.4036103  |
| H | -1.1162296 | 1.8960799  | 1.4360713  |
| H | -1.1983888 | 0.8334770  | 2.8803308  |
| C | 1.3438880  | 0.5972856  | 1.7289690  |
| H | 1.4663721  | 1.6461008  | 1.3818857  |
| H | 2.2000429  | 0.0050628  | 1.3392339  |
| H | 1.3927290  | 0.5958066  | 2.8398316  |

---

functional BP86

geometry optimisation SV(P)

Energy -383.1865243518

NIMAG 0

Zero-point correction 0.1779110

single point TZVP

Energy -383.6135932059

---

### Results for *N*-tert-butylimidazole

|   |           |           |           |
|---|-----------|-----------|-----------|
| C | -0.011453 | -1.069384 | -1.101241 |
| H | -0.017378 | -2.101090 | -0.753223 |
| N | 0.003802  | -0.704299 | -2.363992 |
| C | 0.003761  | 0.665532  | -2.343981 |

|   |           |           |           |
|---|-----------|-----------|-----------|
| H | 0.011915  | 1.254326  | -3.263247 |
| C | -0.013271 | 1.126909  | -1.045969 |
| H | -0.012948 | 2.135805  | -0.639098 |
| N | -0.026512 | 0.001121  | -0.241197 |
| C | 0.002887  | -0.001733 | 1.243834  |
| C | -0.155444 | -1.438767 | 1.765759  |
| H | -1.101415 | -1.892155 | 1.422173  |
| H | -0.167430 | -1.423929 | 2.869246  |
| H | 0.681230  | -2.086245 | 1.451006  |
| C | -1.162753 | 0.858286  | 1.770070  |
| H | -2.130644 | 0.463391  | 1.414603  |
| H | -1.079350 | 1.907587  | 1.439309  |
| H | -1.168592 | 0.853999  | 2.874520  |
| C | 1.353793  | 0.573048  | 1.715249  |
| H | 1.490626  | 1.612409  | 1.369189  |
| H | 2.190944  | -0.029988 | 1.321778  |
| H | 1.409841  | 0.570373  | 2.818612  |

---

functional B3LYP

geometry optimisation SV(P)

Energy -382.9167210302

NIMAG 0

Zero-point correction 0.1829166

single point TZVP

Energy -383.3498709333

---

### Results for the adduct 3#-Et<sub>3</sub>N

|    |           |           |           |
|----|-----------|-----------|-----------|
| Cu | -0.032757 | 1.464652  | -0.074754 |
| Cu | 0.203747  | -1.274289 | -0.543192 |
| Br | 2.063988  | 0.429380  | -0.802060 |
| Br | -0.372670 | -2.198206 | -2.678102 |
| C  | -0.640541 | 1.466431  | 1.755198  |
| N  | -1.676565 | 0.689029  | 2.234837  |
| C  | -1.849087 | 0.840270  | 3.606974  |
| H  | -2.623986 | 0.312594  | 4.174178  |
| C  | -0.905398 | 1.743346  | 4.011956  |
| H  | -0.715949 | 2.149372  | 5.008939  |
| N  | -0.179491 | 2.120148  | 2.880225  |
| C  | 1.076313  | 2.949711  | 2.929835  |
| C  | 1.126704  | 3.881049  | 1.707346  |
| H  | 1.150057  | 3.288680  | 0.765994  |
| H  | 2.052991  | 4.493677  | 1.747210  |
| H  | 0.249627  | 4.563356  | 1.680149  |

|   |           |           |           |
|---|-----------|-----------|-----------|
| C | 1.079608  | 3.803660  | 4.212714  |
| H | 0.164635  | 4.431137  | 4.293962  |
| H | 1.956671  | 4.484610  | 4.186030  |
| H | 1.178120  | 3.188523  | 5.133138  |
| C | 2.282179  | 1.986064  | 2.923008  |
| H | 2.232661  | 1.287681  | 3.787879  |
| H | 3.231172  | 2.561316  | 2.995422  |
| H | 2.303346  | 1.390465  | 1.983078  |
| C | -2.330129 | -0.334656 | 1.429196  |
| H | -2.177997 | -0.058260 | 0.366018  |
| H | -3.412465 | -0.364446 | 1.672274  |
| C | -0.604883 | -2.074619 | 1.011335  |
| N | -1.762245 | -1.652025 | 1.639376  |
| C | -2.228976 | -2.586278 | 2.563121  |
| H | -3.138618 | -2.440506 | 3.157169  |
| C | -1.349856 | -3.632847 | 2.515950  |
| H | -1.360511 | -4.575395 | 3.070102  |
| N | -0.364901 | -3.305905 | 1.581949  |
| C | 0.707488  | -4.262076 | 1.132108  |
| C | 0.153019  | -5.076658 | -0.055812 |
| H | -0.751960 | -5.652219 | 0.242716  |
| H | 0.920551  | -5.799478 | -0.409932 |
| H | -0.109953 | -4.399410 | -0.900739 |
| C | 1.077867  | -5.191620 | 2.306956  |
| H | 1.380294  | -4.612750 | 3.207878  |
| H | 1.937626  | -5.826154 | 2.005050  |
| H | 0.252197  | -5.882459 | 2.583165  |
| C | 1.959683  | -3.475110 | 0.704359  |
| H | 2.314249  | -2.799069 | 1.511409  |
| H | 1.768265  | -2.865078 | -0.207185 |
| H | 2.770624  | -4.194544 | 0.459035  |
| N | -0.718600 | 2.459420  | -1.906122 |
| C | 0.328286  | 3.487159  | -2.178504 |
| H | 1.273892  | 2.925189  | -2.333720 |
| H | 0.465129  | 4.065706  | -1.238695 |
| C | 0.108363  | 4.489114  | -3.324985 |
| H | 0.959707  | 5.205852  | -3.335942 |
| H | -0.821354 | 5.085899  | -3.197599 |
| C | -2.189395 | 4.046936  | -0.571386 |
| H | -1.812034 | 3.616822  | 0.381937  |
| H | -3.256401 | 4.329167  | -0.433588 |
| C | -2.075029 | 3.028572  | -1.706082 |
| H | -2.747435 | 2.165971  | -1.500575 |
| H | -2.448654 | 3.495318  | -2.650079 |
| H | 0.070574  | 4.004406  | -4.321404 |
| H | -1.627301 | 4.983403  | -0.780880 |
| C | -0.746314 | 1.335213  | -2.898030 |
| C | -1.331552 | 1.560533  | -4.300064 |
| H | -1.309606 | 0.503418  | -2.422003 |
| H | 0.292405  | 0.955585  | -2.977695 |

|   |           |          |           |
|---|-----------|----------|-----------|
| H | -1.356934 | 0.567285 | -4.798987 |
| H | -2.373587 | 1.949576 | -4.284319 |
| H | -0.718364 | 2.234189 | -4.935112 |

---

functional BP86

geometry optimisation SV(P)

Energy -9526.2066953030

NIMAG 0

Zero-point correction 0.5696300

single point TZVP

Energy -9528.5365420730

---

### Results for the adduct 3#-Et<sub>3</sub>N

|    |           |           |           |
|----|-----------|-----------|-----------|
| Cu | -0.049022 | 1.377970  | 0.146936  |
| Cu | 0.482726  | -1.094332 | -0.750637 |
| Br | 2.354112  | 0.413855  | -0.299576 |
| Br | -1.034727 | -0.368550 | -2.601299 |
| C  | -0.818253 | 0.603967  | 1.827200  |
| N  | -1.804717 | -0.349184 | 1.883630  |
| C  | -2.094262 | -0.715946 | 3.189077  |
| H  | -2.847974 | -1.459640 | 3.439709  |
| C  | -1.277885 | 0.020238  | 3.981158  |
| H  | -1.203143 | 0.042548  | 5.063141  |
| N  | -0.505539 | 0.823191  | 3.144293  |
| C  | 0.659787  | 1.618092  | 3.664283  |
| C  | 0.901984  | 2.849135  | 2.786683  |
| H  | 1.168690  | 2.562722  | 1.757037  |
| H  | 1.745108  | 3.427398  | 3.203337  |
| H  | 0.011610  | 3.500288  | 2.761603  |
| C  | 0.355133  | 2.094909  | 5.097636  |
| H  | -0.602012 | 2.644256  | 5.147135  |
| H  | 1.156913  | 2.779112  | 5.422499  |
| H  | 0.327747  | 1.267436  | 5.827057  |
| C  | 1.898234  | 0.701118  | 3.657974  |
| H  | 1.727698  | -0.191738 | 4.287145  |
| H  | 2.772162  | 1.242759  | 4.062486  |
| H  | 2.137087  | 0.373761  | 2.630710  |
| C  | -2.345638 | -1.062449 | 0.737258  |
| H  | -2.143011 | -0.486362 | -0.180489 |
| H  | -3.431966 | -1.185095 | 0.866698  |
| C  | -0.497605 | -2.583223 | 0.096502  |
| N  | -1.755659 | -2.385700 | 0.593572  |
| C  | -2.368188 | -3.586074 | 0.928269  |

|   |           |           |           |
|---|-----------|-----------|-----------|
| H | -3.378496 | -3.645730 | 1.329398  |
| C | -1.471737 | -4.564525 | 0.631394  |
| H | -1.567068 | -5.640672 | 0.733584  |
| N | -0.333200 | -3.934997 | 0.132778  |
| C | 0.909721  | -4.617335 | -0.359966 |
| C | 1.034145  | -4.367870 | -1.874384 |
| H | 0.169942  | -4.793256 | -2.415241 |
| H | 1.955721  | -4.837200 | -2.262072 |
| H | 1.070141  | -3.287433 | -2.093989 |
| C | 0.815412  | -6.127468 | -0.093355 |
| H | 0.707432  | -6.352668 | 0.982793  |
| H | 1.746466  | -6.605747 | -0.441377 |
| H | -0.019637 | -6.596620 | -0.642790 |
| C | 2.120353  | -4.038232 | 0.394219  |
| H | 2.026047  | -4.217203 | 1.480711  |
| H | 2.207736  | -2.951247 | 0.229579  |
| H | 3.047949  | -4.521265 | 0.039983  |
| N | -0.305451 | 3.168347  | -1.155366 |
| C | 0.019928  | 4.340572  | -0.303374 |
| H | 1.097424  | 4.275349  | -0.075151 |
| H | -0.508188 | 4.204717  | 0.654273  |
| C | -0.307406 | 5.753642  | -0.813984 |
| H | -0.049774 | 6.480027  | -0.020917 |
| H | -1.381330 | 5.882258  | -1.035233 |
| C | -2.769364 | 3.190812  | -0.555561 |
| H | -2.628341 | 2.351866  | 0.148528  |
| H | -3.767808 | 3.088909  | -1.018149 |
| C | -1.705202 | 3.171270  | -1.650800 |
| H | -1.820395 | 2.253750  | -2.249787 |
| H | -1.876413 | 4.030803  | -2.329201 |
| H | 0.259282  | 6.033601  | -1.715348 |
| H | -2.772182 | 4.129096  | 0.028192  |
| C | 0.662312  | 2.936411  | -2.270840 |
| C | 0.720209  | 3.933290  | -3.437326 |
| H | 0.417734  | 1.940243  | -2.672416 |
| H | 1.659551  | 2.844867  | -1.812111 |
| H | 1.366805  | 3.498798  | -4.221324 |
| H | -0.266888 | 4.113181  | -3.898292 |
| H | 1.157036  | 4.908916  | -3.163293 |

---

functional B3LYP

geometry optimisation SV(P)

Energy -9523.9308032480

NIMAG 0

Zero-point correction 0.5863450

single point TZVP

Energy -9526.2648876230

---

### Results for triethylamine E<sub>3</sub>N

|   |           |           |           |
|---|-----------|-----------|-----------|
| N | -0.097637 | -0.000396 | -0.280311 |
| C | 0.334653  | 1.248206  | 0.350743  |
| C | 1.726509  | 1.740331  | -0.078167 |
| H | 0.302241  | 1.172956  | 1.472508  |
| H | -0.402070 | 2.036657  | 0.078623  |
| H | 1.934656  | 2.740928  | 0.365015  |
| H | 2.536406  | 1.056013  | 0.251116  |
| H | 1.783705  | 1.825960  | -1.185270 |
| C | 0.350410  | -1.232927 | 0.372248  |
| C | 1.727603  | -1.742133 | -0.084501 |
| H | -0.395647 | -2.027005 | 0.145758  |
| H | 0.351146  | -1.124665 | 1.491369  |
| H | 1.944279  | -2.733064 | 0.376308  |
| H | 1.752165  | -1.854798 | -1.190366 |
| H | 2.549330  | -1.053838 | 0.204628  |
| C | -1.494271 | -0.012376 | -0.720770 |
| C | -2.572509 | -0.000764 | 0.382081  |
| H | -1.639597 | -0.909372 | -1.365617 |
| H | -1.647316 | 0.864840  | -1.390699 |
| H | -3.592460 | -0.011721 | -0.064940 |
| H | -2.487653 | -0.889659 | 1.046350  |
| H | -2.495097 | 0.908249  | 1.019382  |

---

functional BP86

geometry optimisation SV(P)

Energy -292.1687560833

NIMAG 0

Zero-point correction 0.1989311

single point TZVP

Energy -292.5107964360

---

### Results for triethylamine E<sub>3</sub>N

|   |           |           |           |
|---|-----------|-----------|-----------|
| N | -0.094618 | -0.000513 | -0.248170 |
| C | 0.344894  | 1.242690  | 0.378249  |
| C | 1.708973  | 1.757365  | -0.100427 |
| H | 0.360937  | 1.149301  | 1.489009  |
| H | -0.405340 | 2.021635  | 0.153032  |

|   |           |           |           |
|---|-----------|-----------|-----------|
| H | 1.927162  | 2.743602  | 0.351668  |
| H | 2.531932  | 1.076495  | 0.174572  |
| H | 1.714948  | 1.866711  | -1.199643 |
| C | 0.352314  | -1.237020 | 0.386537  |
| C | 1.711060  | -1.756349 | -0.102284 |
| H | -0.400085 | -2.018767 | 0.178787  |
| H | 0.380959  | -1.131212 | 1.495809  |
| H | 1.933828  | -2.738983 | 0.355439  |
| H | 1.705292  | -1.874764 | -1.200565 |
| H | 2.536831  | -1.073449 | 0.158600  |
| C | -1.474940 | -0.006114 | -0.721998 |
| C | -2.572380 | -0.000198 | 0.356651  |
| H | -1.609058 | -0.891903 | -1.370610 |
| H | -1.612329 | 0.869925  | -1.383180 |
| H | -3.576004 | -0.006358 | -0.108493 |
| H | -2.501589 | -0.887681 | 1.012202  |
| H | -2.505857 | 0.898105  | 0.997680  |

---

functional B3LYP

geometry optimisation SV(P)

Energy -291.9543667610

NIMAG 0

Zero-point correction 0.2043762

single point TZVP

Energy -292.3020723678

---

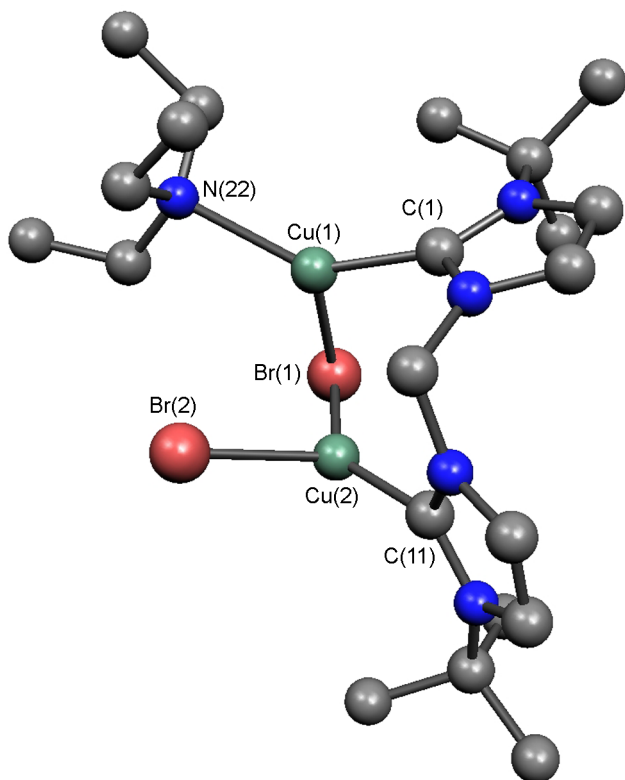

**Figure S1.** B3LYP/SV(P)-optimised structure of **3#·Et<sub>3</sub>N** in a gas phase. Hydrogen atoms are omitted.

**Table S1.** Comparison of geometrical parameters of B3LYP/SV(P) or BP86/SV(P) gas-phase equilibrium structures of **6-7** and **3#·Et<sub>3</sub>N**.

| Distance (Å)<br>or Angle (°) | B3LYP/SV(P) |          |                           | BP86/SV(P) |          |                           |
|------------------------------|-------------|----------|---------------------------|------------|----------|---------------------------|
|                              | <b>6</b>    | <b>7</b> | <b>3#·Et<sub>3</sub>N</b> | <b>6</b>   | <b>7</b> | <b>3#·Et<sub>3</sub>N</b> |
| Cu(1)-Cu(2)                  | 2.824       | 2.778    | 2.683                     | 2.708      | 2.686    | 2.789                     |
| Cu(1)-C(1)                   | 1.958       | 1.965    | 2.004                     | 1.916      | 1.922    | 1.928                     |
| Cu(2)-C(11)                  | 1.976       | 1.978    | 1.974                     | 1.926      | 1.927    | 1.926                     |
| Cu(1)-N(22)                  | 2.035       | 2.101    | 2.229                     | 2.013      | 2.080    | 2.194                     |
| Cu(1)-Br(1)                  | 2.536       | 2.563    | 2.628                     | 2.506      | 2.535    | 2.449                     |
| Cu(2)-Br(1)                  | 2.516       | 2.493    | 2.445                     | 2.50       | 2.473    | 2.536                     |
| Cu(2)-Br(2)                  | 2.426       | 2.457    | 2.501                     | 2.404      | 2.435    | 2.397                     |
| C(1)-Cu(1)-N(22)             | 134.0       | 139.8    | 139.1                     | 132.7      | 139.6    | 133.9                     |
| Cu(2)-Br(1)-Cu(1)            | 68.0        | 66.6     | 63.8                      | 65.5       | 64.9     | 68.0                      |
| C(11)-Cu(2)-Br(2)            | 117.7       | 113.4    | 103.6                     | 119.7      | 115.0    | 117.2                     |

End of the document
